# Supplementary material for: Plasmodium falciparum strains spontaneously switch invasion phenotype in suspension culture
Source: PubMed Central journal article supplement (PMC5893586; doi:10.1038/s41598-018-24218-0), 2018-04-10
Supplement: 41598_2018_24218_MOESM1_ESM.pdf [file 41598_2018_24218_MOESM1_ESM.pdf]

1 ***Plasmodium falciparum* strains spontaneously switch invasion phenotype in suspension**  
2 **culture**

3 Gordon A. Awandare<sup>1,2\*†</sup>, Prince B. Nyarko<sup>1†</sup>, Yaw Aniweh<sup>1</sup>, Reuben Ayivor-Djanie<sup>1,3</sup>, and Jose  
4 A. Stoute<sup>4</sup>

5 **Supplementary data**

6  
7

**FIGURE S1**

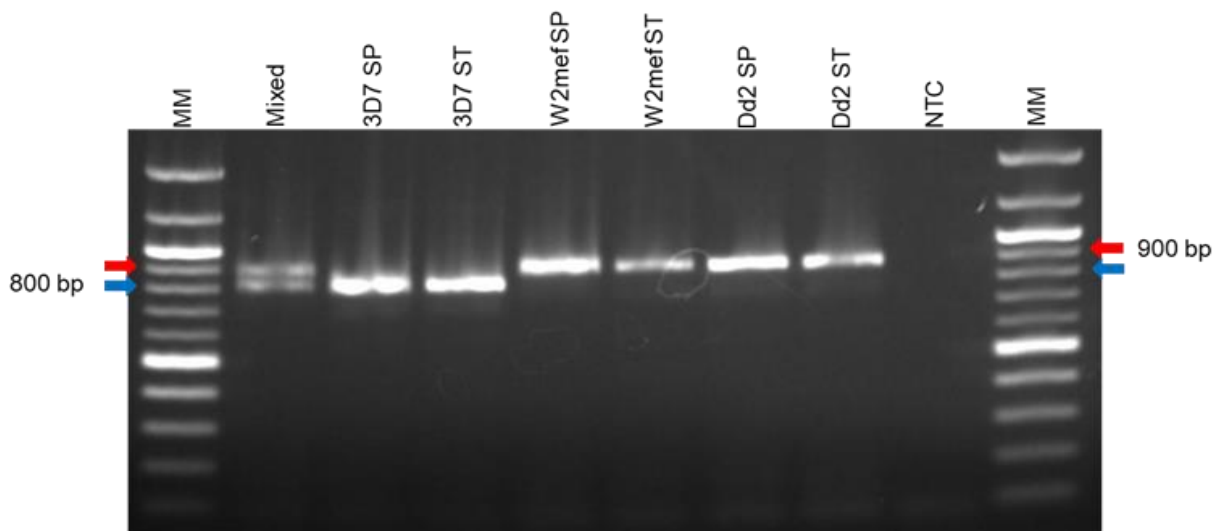

8  
9  
10  
11  
12  
13  
14  
15  
16  
17  
18  
19

**Figure S1: *Static* and *Suspended* parasites are genetically identical.** A section of the MSP2 gene was amplified from genomic DNA of week 6 parasites. Amplicons were resolved on an ethidium bromide-stained 1 % agarose gel. The primer pair generated amplicons of approximately 800 bp (blue arrow) for 3D7, and 900 bp (red arrow) for Dd2 and W2mef. A combination of all three strains (mixed) showed only two distinct bands of sizes equivalent to 800 bp (3D7) and 900 bp (Dd2/W2mef), respectively. Product sizes were estimated with a 100 bp molecular weight marker (MM). NTC = non template control, ST = *Static*, and SP = *Suspended*.

20  
21

**FIGURE S2**

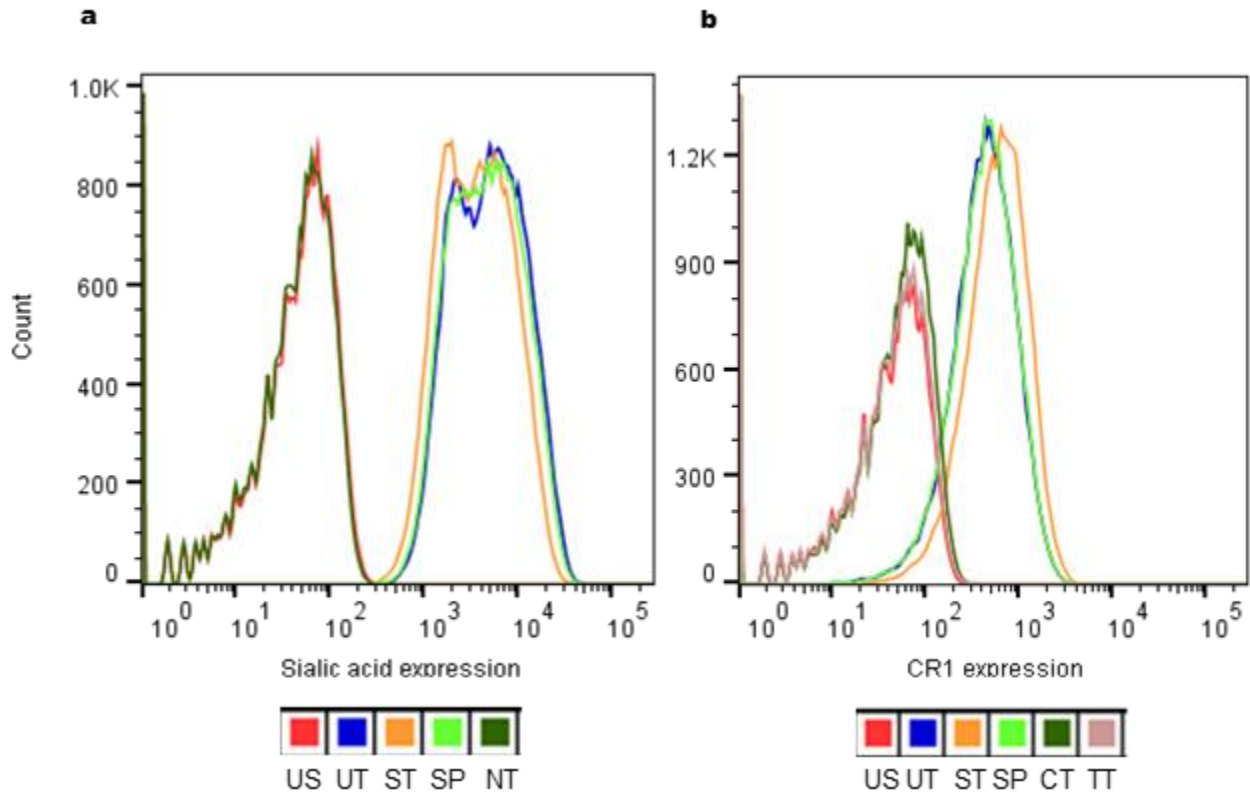

22  
23  
24  
25  
26  
27  
28  
29  
30  
31  
32  
33  
34  
35

**Figure S2: Shaking does not affect the levels of sialic acid and complement receptor 1 on erythrocyte surfaces.** Erythrocyte surface expression of the invasion receptors (A) sialic acid (SA) and (B) complement receptor 1 (CR1) was determined in *Static* and *Suspended* cultures after two weeks of incubation using flow cytometry. Untreated control (UT), Nm-treated (NT), Chymotrypsin-treated (CT), and trypsin-treated (TT) erythrocytes were stained with mouse monoclonal anti-human GPA antibodies specific to SA or mouse monoclonal anti-human CR1 antibodies. Unstained control erythrocytes (US) were included for comparison. Phycoerythrin (PE)-conjugated goat polyclonal anti-mouse antibodies were used as secondary antibodies. Data were analysed with Flowjo software V10.

FIGURE S3

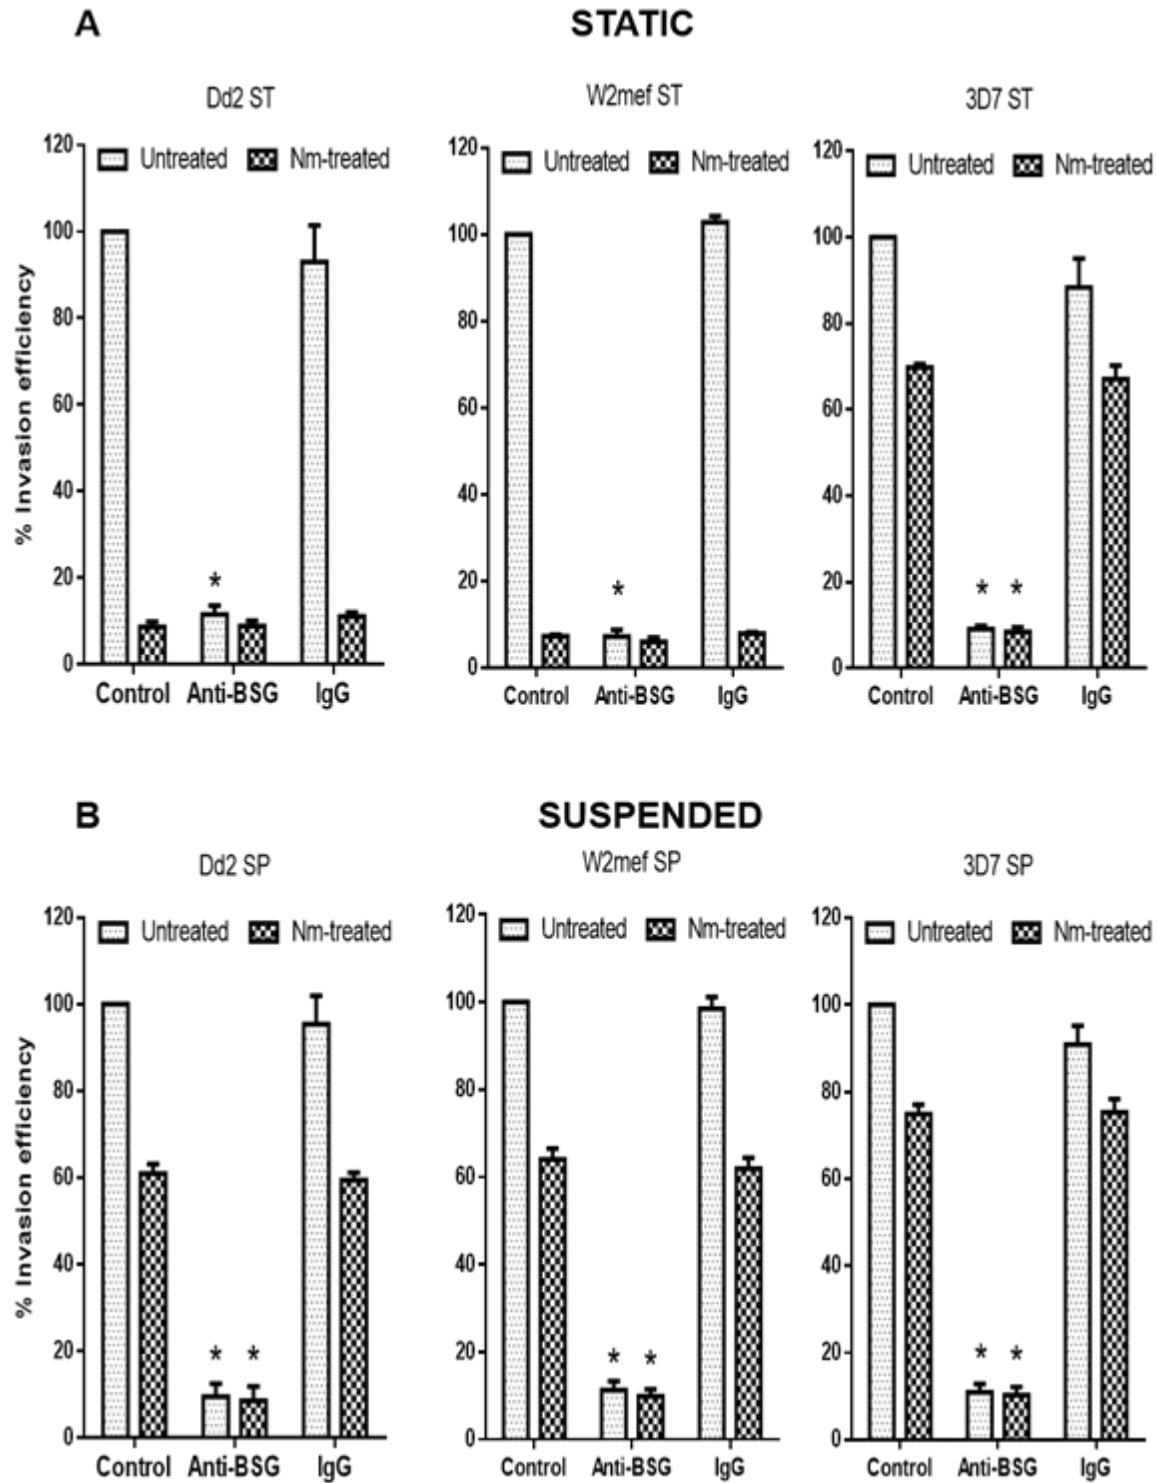

37

38

39

40 **Figure S3: Phenotypic switching of *Suspended* cultures not basigin-dependent.** Anti-  
41 basigin antibodies (10 $\mu$ g/mL) ablated invasion of both *Static* (ST) *Suspended* (SP) parasites  
42 into untreated and Nm-treated erythrocytes. Invasion rates were determined by flow cytometry  
43 as percentage of ring-infected erythrocytes after 12-16 hours' incubation, and expressed as  
44 invasion efficiency relative to invasion of untreated erythrocytes. Data are presented as mean  $\pm$   
45 standard errors of three independent experiments performed in triplicates. \* *P*-value < 0.05 at  
46 95 % CI compared to IgG control; student t-test.  
47  
48  
49  
50  
51  
52  
53
